# Supplementary material for: High Variability in Nicotine Analog Contents, Misleading Labeling, and Artificial Sweetener in New E-Cigarette Products Marketed as “FDA-Exempt”
Source: bioRxiv or medRxiv preprint supplement (doi:10.1101/2024.04.19.24306019), 2024-04-22
Supplement: Supplementary file [file media-1.pdf]

## Supplemental Materials

Erythropel HC, Jabba SV, Silinski P, Anastas PT, Krishnan-Sarin S, Zimmerman JB, Jordt SE. High Variability in Nicotine Analog Contents, Misleading Labeling, and Artificial Sweetener in New E-Cigarette Products Marketed as "FDA-Exempt".

**Table S1: Flavorant compounds detected in tested “SpreeBar” and “Nixotine” products.**

NA: nicotinamide

|                            | Flavorant compounds identified by GC/MS (NIST database)                                                                                                                                                     |
|----------------------------|-------------------------------------------------------------------------------------------------------------------------------------------------------------------------------------------------------------|
| <b>‘SpreeBar’ products</b> |                                                                                                                                                                                                             |
| Blood Orange Peach         | $\gamma$ -Decalactone, ethyl butyrate, ethyl hexanoate, 3-hexenol, 3-hexenyl butyrate, hexyl acetate, isoamyl acetate, linalool, methyl octanoate, nerol, rheosmin, $\alpha$ -terpineol, WS-23 <sup>a</sup> |
| Blue Razz Ice              | Methyl benzoate, 2-methylbutyl 2-methylbutanoate, raspberry ketone, rheosmin, WS-23                                                                                                                         |
| Creamy Melon               | Ethyl butyrate, ethyl maltol, ethyl vanillin, ethylvanillin propylene glycol acetal, melonal, 6-nonenol, vanillin, vanillin propylene glycol acetal, WS-23                                                  |
| Pineapple Coconut          | Allyl hexanoate, $\gamma$ -decalactone, ethyl butyrate, ethyl heptanoate, ethyl hexanoate, 3-hexenol, 3-hexen-1-ol acetate, maltol, WS-23                                                                   |
| Rainbowfruit               | Benzyl alcohol, $\alpha$ -cumyl alcohol, ethyl butyrate, methyl anthranilate, WS-23                                                                                                                         |
| Strawberry Apple Melon     | Benzaldehyde propylene glycol acetal, $\gamma$ -decalactone, ethyl butyrate, ethyl hexanoate, 3-hexenol, hexyl acetate, isoamyl 2-methyl butyrate, linalool, methyl hexanoate, methyl cinnamate, WS-23      |
| Strawberry Mango           | Benzyl alcohol, $\gamma$ -decalactone, ethyl butyrate, 3-hexenol, WS-23                                                                                                                                     |
| Sweet Spearmint            | Carvone, eucalyptol, limonene, menthol, menthone, vanillin, WS-23                                                                                                                                           |
| Watermelon Grape           | Benzyl acetate, benzyl alcohol, $\gamma$ -decalactone, ethyl butyrate, 3-hexenol, menthyl acetate, methyl cinnamate, WS-23                                                                                  |
| <b>‘Nixotine’ products</b> |                                                                                                                                                                                                             |
| Unflavored 0 mg/mL NA      | none                                                                                                                                                                                                        |
| Unflavored 12 mg/mL NA     |                                                                                                                                                                                                             |
| Unflavored 24 mg/mL NA     |                                                                                                                                                                                                             |
| Unflavored 36 mg/mL NA     |                                                                                                                                                                                                             |
| Cherry 0 mg/mL NA          | Benzaldehyde, benzaldehyde propylene glycol acetal, benzaldehyde glycerol acetal                                                                                                                            |
| Cherry 12 mg/mL NA         |                                                                                                                                                                                                             |
| Cherry 24 mg/mL NA         |                                                                                                                                                                                                             |
| Cherry 36 mg/mL NA         |                                                                                                                                                                                                             |

<sup>a</sup> IUPAC name of WS-23: 2-Isopropyl-N,2,3-trimethylbutanamide; CAS # 51115-67-4

## Supplemental Methods

**Chemicals & analytical standards:** Methanol, Water + 0.1% formic acid (FA), ACN + 0.1% FA, ammonium formate, propylene glycol, and glycerol were purchased >99% purity from Fisher Scientific (Waltham, MA). Nicotinamide and neotame at purities >99% and ammonium hydroxide as a 25% solution were purchased from Sigma-Aldrich, St. Louis, MO. Racemic (+/-) 6-methyl nicotine was purchased from Santa Cruz Biotechnology, Dallas, TX.

**GC/MS:** Gas chromatography (GC) coupled with mass spectrometry (MS) was carried out on a Clarus 580 GC coupled with SQ8S MS (PerkinElmer, Waltham, MA), fitted with a Elite-5MS column (length 60 m, id 0.25 mm, 0.25  $\mu$ m film; PerkinElmer). Injection volume: 1  $\mu$ L; split ratio: 10; program: 40  $^{\circ}$ C for 7 min; ramp 10  $^{\circ}$ C/min to 50  $^{\circ}$ C then hold for 20 min; ramp 10  $^{\circ}$ C/min to 310  $^{\circ}$ C then hold for 8 min; ramp 10  $^{\circ}$ C/min to 325  $^{\circ}$ C then hold for 11.5 min. Injector temperature: 300  $^{\circ}$ C; MS settings: ionization mode: electron impact ionization (EI+); m/z 30-620.

**GC/FID:** GC coupled with flame ionization detection (FID) was carried out on a GC-2010 (Shimadzu, Columbia, MD) fitted with a J&W DB-5 column (length 60 m, id 0.25 mm, 0.25  $\mu$ m film; Agilent, Santa Clara, CA). Injection volume: 1  $\mu$ L; split ratio: 300; program: 30  $^{\circ}$ C for 7 min; ramp 10  $^{\circ}$ C/min to 50  $^{\circ}$ C then hold for 20 min; ramp 10  $^{\circ}$ C/min to 310  $^{\circ}$ C then hold for 12 min. Injector temperature: 250  $^{\circ}$ C; detector temperature: 325  $^{\circ}$ C. Calibration curves for 6-methyl nicotine (6MN) and nicotinamide (NA) with  $\geq 4$  points were constructed and used to quantify 6MN in "SpreeBar" products and NA in "Nixotine" products. 6MN: Limit of quantification: 30  $\mu$ g/mL; limit of detection: 10  $\mu$ g/mL. NA: Limit of quantification: 35  $\mu$ g/mL, limit of detection: 10  $\mu$ g/mL.

**Chiral LC/MS/MS for 6MN:** Liquid chromatography (LC) coupled with MS/MS was carried out on a Vanquish LC coupled to a Quantis MS (Thermo Fisher Scientific). Chiral separation was achieved using a ChiralPAK AGP column (150 mm x 4 mm id, 5  $\mu$ m particle size; Daicel Corporation, West Chester, PA) using an isocratic mobile phase program consisting of 90:10 (v/v) of 30 mM ammonium formate with 0.3%  $\text{NH}_4\text{OH}$  and methanol at 0.4 mL/min flow with a total runtime of 25 min at 25 $^{\circ}$ C and an injection volume of 10  $\mu$ L. MS/MS was carried out in heated electrospray ionization (H-ESI) mode at spray voltage: 3500 V (positive), 2500 V (negative); ion transfer tube temperature 300  $^{\circ}$ C; vaporizer temperature 350  $^{\circ}$ C; using selected reaction monitoring (SRM) mode for the following compounds:

| Compound          | Polarity | Precursor (m/z) | Product 1 (m/z)<br>(Quantifying) | Product 2 (m/z)<br>(Confirming) | Product 3 (m/z)<br>(Confirming) |
|-------------------|----------|-----------------|----------------------------------|---------------------------------|---------------------------------|
| 6-Methyl nicotine | Positive | 177.1           | 146.0                            | 144.0                           | 130.9                           |
| Nicotine          | Positive | 163.1           | 117.0                            | 130.0                           | 132.0                           |

Absent optically pure standards, (S)-6MN was tentatively identified based on the relative retention time of pure (S)-nicotine, which elutes after (R)-nicotine in the described conditions. For 'SpreeBar' samples, only the second of the two peaks detected in the racemic (+-) 6MN was detected for all samples:

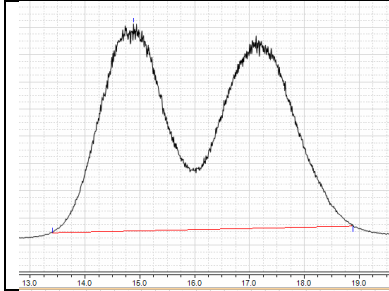

SRM results for (+-) 6MN standard  
(X-axis: time, Y-axis: counts)

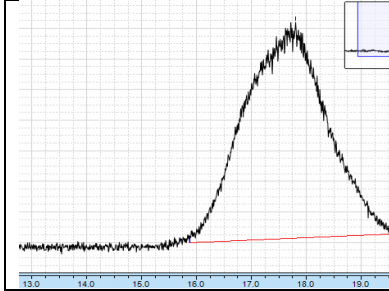

Example SRM result, here for SpreeBar Watermelon Grape  
(X-axis: time, Y-axis: counts)

**LC/MS/MS for artificial sweeteners:** Liquid chromatography (LC) coupled with MS/MS was carried out on a Vanquish LC coupled to a Quantis MS (Thermo Fisher Scientific). Compound separation was achieved via an established procedure using an Accucore RP-MS column (50 mm x 2.1 mm id, 2.6 µm particle size, Thermo Fisher Scientific) using a binary mobile phase program of (A) water + 0.1% formic acid and (B) acetonitrile + 0.1% formic acid at 0.4 mL/min flow with a total runtime of 8 min at 40 °C and an injection volume of 10 µL. The gradient was as follows:

| Time (min) | A (%) | B (%) |
|------------|-------|-------|
| 0          | 95    | 5     |
| 0.5        | 95    | 5     |
| 2.5        | 5     | 95    |
| 4.5        | 5     | 95    |
| 4.6        | 95    | 5     |

MS/MS was carried out in heated electrospray ionization (H-ESI) mode at spray voltage: 3500 V (positive), 2500 V (negative); ion transfer tube temperature 300 °C; vaporizer temperature 350 °C; using selected reaction monitoring (SRM) mode for the following compounds:

| Compound         | Polarity | Precursor (m/z) | Product 1 (m/z)<br>(Quantifying) | Product 2 (m/z)<br>(Confirming) | Product 3 (m/z)<br>(Confirming) |
|------------------|----------|-----------------|----------------------------------|---------------------------------|---------------------------------|
| Acesulfame K     | Negative | 161.9           | 81.9                             | 77.9                            |                                 |
| Advantame        | Negative | 443.1           | 425.0                            | 243.9                           |                                 |
| Aspartame        | Positive | 295.1           | 120.0                            | 180.0                           | 235.0                           |
| Glucose          | Negative | 76.9            | 60.1                             |                                 |                                 |
| Glycyrrhizin     | Negative | 821.4           | 351.0                            | 113.0                           |                                 |
| Neotame          | Positive | 380.2           | 172.0                            | 320.0                           |                                 |
| Saccharin        | Negative | 181.9           | 105.9                            | 42.0                            |                                 |
| Sodium cyclamate | Negative | 177.9           | 79.9                             |                                 |                                 |
| Sorbitol         | Negative | 181             | 88.9                             | 71.0                            | 100.9                           |
| Stevioside       | Negative | 803.3           | 641.2                            | 479.2                           |                                 |
| Sucralose        | Negative | 397             | 361.0                            | 359.0                           |                                 |
| Sucrose          | Positive | 365             | 202.9                            | 184.9                           |                                 |

Only neotame was detected in 'SpreeBar' samples and calibration curves for neotame with ≥ 4 points were constructed and used to quantify neotame in 'SpreeBar' products. Neotame: Limit of quantification: 5 ng/mL, limit of detection: 1 ng/mL.
